# Supplementary material
Source: publisher figshare collection journal article supplement (https://acs.figshare.com/ndownloader/files/5069866)
Supplement: Supplementary file 1 [file 5069866]

# Transition-Metal-Free Synthesis of Alternating Thiophene-Perfluorarene Copolymers

Yongfeng Wang and Mark D. Watson

Department of Chemistry, University of Kentucky, Lexington, KY 40506-0055

[mdwatson@uky.edu](mailto:mdwatson@uky.edu)

**Materials and Methods.** CsF and 18-crown-6 were each dried under reduced pressure ( $< 10^{-3}$  mbar) at 180°C and 80°C, respectively and stored in an argon-filled glove box.  $C_6F_6$  and toluene were distilled from  $CaH_2$  and sodium/potassium alloy, respectively, and stored over molecular sieves under argon. 3,4-dialkoxythiophenes were prepared via modified published procedures.<sup>1</sup> All other materials were used as purchased. Unless otherwise stated, all manipulations and reactions were carried out under argon atmosphere using standard Schlenk techniques.  $^1H$ ,  $^{13}C$ , and  $^{19}F$  NMR spectra were recorded on a Varian INOVA 400MHz spectrometer (purchased under the CRIF Program of the National Science Foundation, grant CHE-9974810). Chemical shifts were referenced to residual protio-solvent signals, except for  $^{19}F$  spectra, where  $CCl_3F$  was added as internal standard and set to  $\delta = 0$  ppm. Relative molecular weight determinations were made using a Waters 600E HPLC system, driven by Waters Empower Software and equipped with two linear mixed-bed GPC columns (American Polymer Standards Corporation, AM Gel Linear/15) in series. Eluting polymers were detected with both refractive index and photodiode array detectors. The system was calibrated with 11 narrow PDI polystyrene samples in the range 580 -  $2 \times 10^6$  Da with toluene at a flow rate of 1mL/min. Differential scanning calorimetry was performed using a Mettler 822°. GC-MS data were collected from an Agilent technologies 6890N GC with 5973 MSD.

## Synthetic procedures.

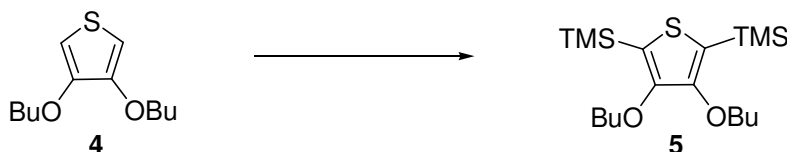

**3,4-dibutyloxy-2,5-bis(trimethylsilyl)thiophene (5).** *n*-BuLi (15.51mL, 1.6M in hexanes, 4eq) was added drop-wise to a solution of 3,4-dibutyloxythiophene (1.42g, 6.22mmol) in 30 mL hexanes:DME (2:1) maintained at 0°C. After stirring at room temperature for 30 minutes, then at reflux for 1 hr, TMSCl (3.14mL, 4eq) was added drop-wise into the suspension and the whole was stirred overnight at room temperature. The mixture was extracted with 10% HCl (aq) and deionized water, dried over  $MgSO_4$ , and concentrated via rotary evaporation. Monomer **5** was isolated after flash chromatography [silica gel, pentane:dichloromethane (3:1)] as a yellow solid (2.10g, 91%).  $^1H$  NMR ( $CDCl_3$ )  $\delta$ : 4.01 (t, 4H), 1.77 (m, 4H), 1.52 (m, 4H), 1.02 (t, 6H), 0.34 (s, 18H).  $^{13}C$  NMR ( $CDCl_3$ )  $\delta$ : 156.85, 126.30, 72.94, 32.41, 19.35, 14.06, -0.39. GC-MS:  $m/z$ : 372 ( $C_{18}H_{36}O_2SSi_2^+$ ), 229 (100%).

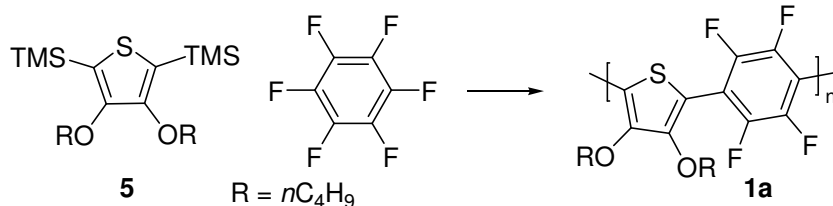

**Polymer 1a.** In an argon-filled glove box, monomer **5** (145mg, 0.389mmol),  $C_6F_6$  (53.95 $\mu$ L, 1.2 eq), CsF (6.19mg, 0.1 eq), 18-crown-6 (20.56mg, 0.2 eq), and toluene (2 mL) were combined in a vacuum flask containing a magnetic stir bar. The vessel was sealed and the contents stirred at 80°C for 5 days. The solution was extracted with deionized water twice and the polymer precipitated by pouring the solution in 50 mL methanol. The polymer was re-dissolved in chloroform then precipitated again into methanol. After drying under reduced pressure, the polymer was obtained as a colorless solid (123 mg).  $^1H$  NMR ( $CDCl_3$ )  $\delta$ : 4.12 (m, 4H), 1.65 (m, 4H), 1.39 (m, 4H), 0.90 (m, 6H).  $^{13}C$  NMR ( $CDCl_3$ )  $\delta$ : 148.77, 144.32 (d of m), 112.37 (m), 110.75, 73.02, 31.90, 18.92, 13.72.  $^{19}F$  NMR ( $CDCl_3$ )  $\delta$ : -137.94 (m, 4 F), -138.81 (m, 147F), -153.41 (m, 2 F), -162.24 (m, 4 F).  $M_n$  (GPC) = 28 kDa (PDI = 2.7)

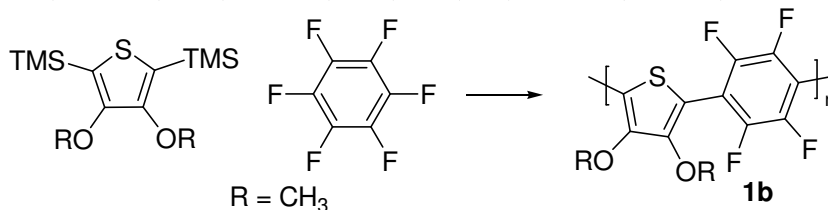

**Polymer 1b.** Conducted exactly as for **polymer 1a** above, except stoichiometry based upon 145mg monomer **3,4-dimethoxy-2,5-bis(trimethylsilyl)thiophene**,  $C_6F_6$  (69.8  $\mu$ L, 1.2 eq), CsF (8.00mg, 0.1 eq), 18-crown-6 (26.59mg, 0.2 eq), and toluene (1.5 mL) and entire reaction conducted at 110°C. Polymer isolated as an insoluble colorless powder. Yield = 124.09mg.

<sup>1</sup> Neeraj Agarwal, Sarada P. Mishra, Anil Kumar, C.-H. Hung and M. Ravikanth, *Chem. Commun.*, **2002**, 2642–2643.

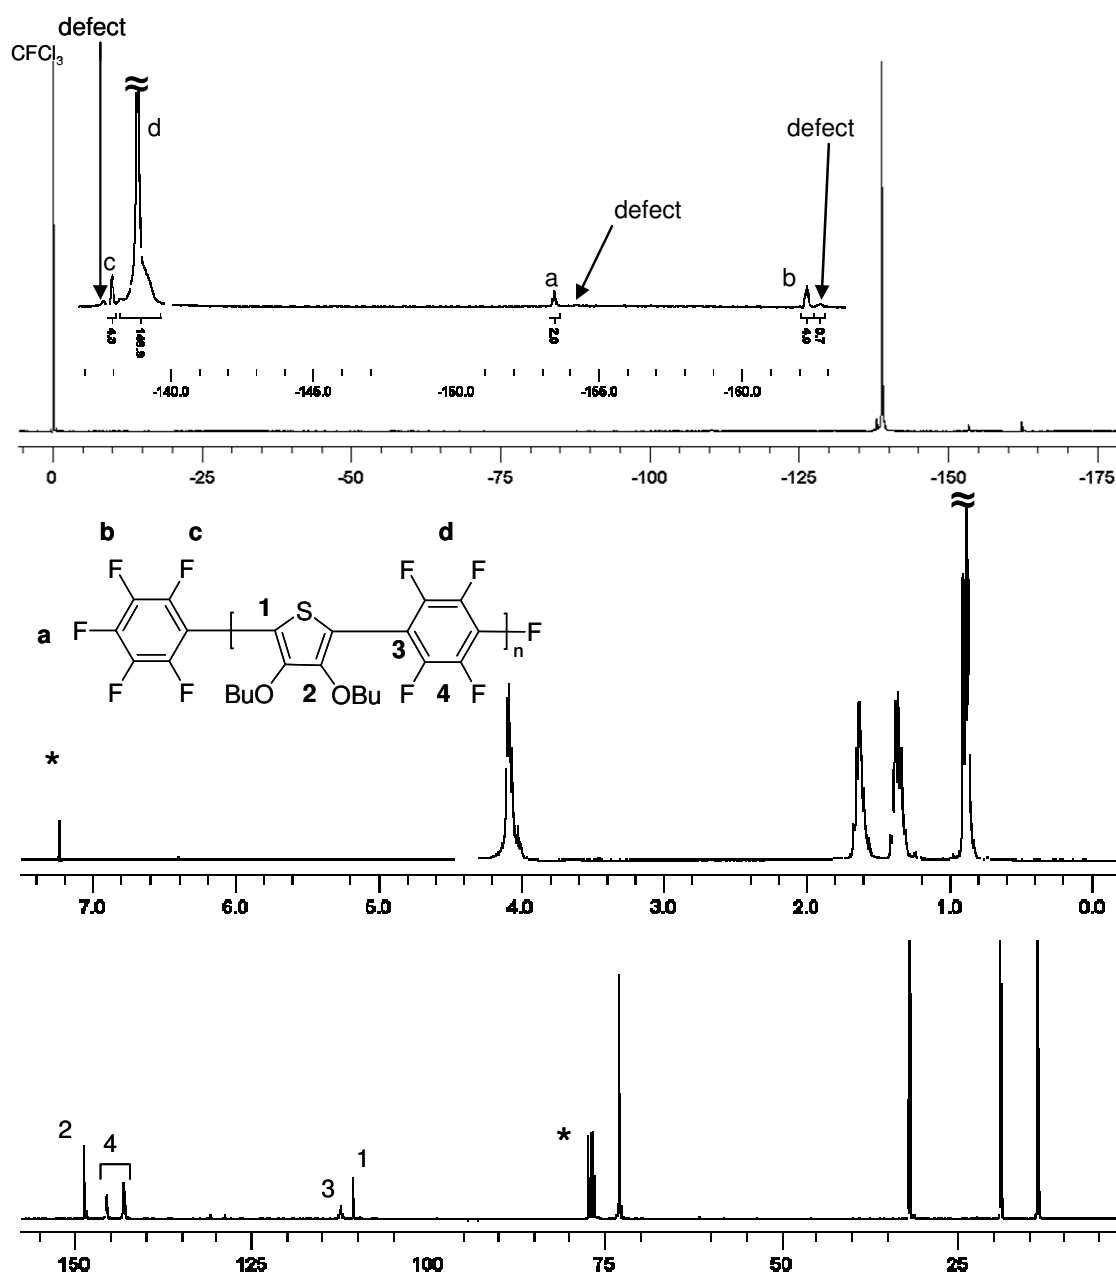

**Figure SI 1.**  $^{19}\text{F}$ ,  $^1\text{H}$ , and  $^{13}\text{C}$  NMR spectra of polymer **1a** in  $\text{CDCl}_3$ . Number average degree of polymerization calculated from  $^{19}\text{F}$  NMR is  $P_n = (146.9\text{F}/4\text{F}) \approx 37$ , or 74 aromatic rings ( $M_n \approx 14$  kDa), in good agreement with GPC data ( $M_n = 28$  kDa, versus polystyrene), which typically overestimates by a factor of 2. \* ( $\text{H})\text{DCCl}_3$  solvent/reference. The integrals in the  $^{19}\text{F}$  spectrum correspond to one polymer chain, terminated by two  $\text{C}_6\text{F}_5$  groups. The most upfield “defect” signal integrates to 0.7 F. If this should correspond to 1 F, then there are a maximum of 0.7 defects per polymer chain. If the signal corresponds to one type of fluorine, of which there should be 2 for each defect, then there are 0.35 defects per polymer chain.

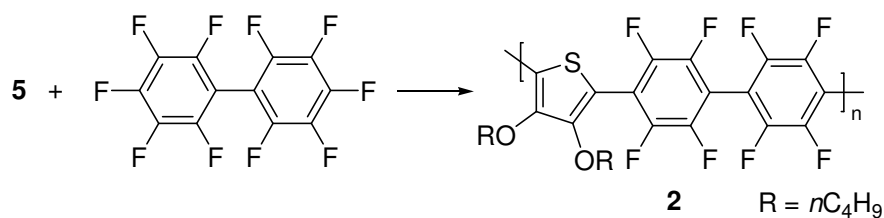

**Polymer 2.** In an argon-filled glove box, monomer **5** (106.7mg, 0.286 mmol) decafluorobiphenyl (100.33mg, 1.05 eq), CsF (4.55mg, 0.1 eq), 18-crown-6 (15.12mg, 0.2 eq) and toluene (1 mL) were combined in a vacuum flask containing a magnetic stir bar. The vessel was sealed and the contents stirred at 80°C for 7 days. The polymer was obtained as a colorless powder after purification as described above (148 mg).  $^1H$  NMR ( $C_2D_2Cl_4$ )  $\delta$ : 4.13 (t, 4H), 1.64 (m, 4H), 1.36 (m, 4H), 0.90 (t, 6H).  $^{13}C$  NMR ( $C_2D_2Cl_4$ )  $\delta$ : 148.81, 144.08 (d of m), 113.98 (m), 110.57, 106.79 (m), 73.09, 31.67, 18.81, 13.59.  $^{19}F$  NMR ( $C_2D_2Cl_4$ )  $\delta$ : -137.36 (m, 65F), -138.26 (m, 65F), -149.94 (m, 2F), -160.42 (m, 4F).  $M_n$  (GPC) = 17 kDa (PDI = 3.9)

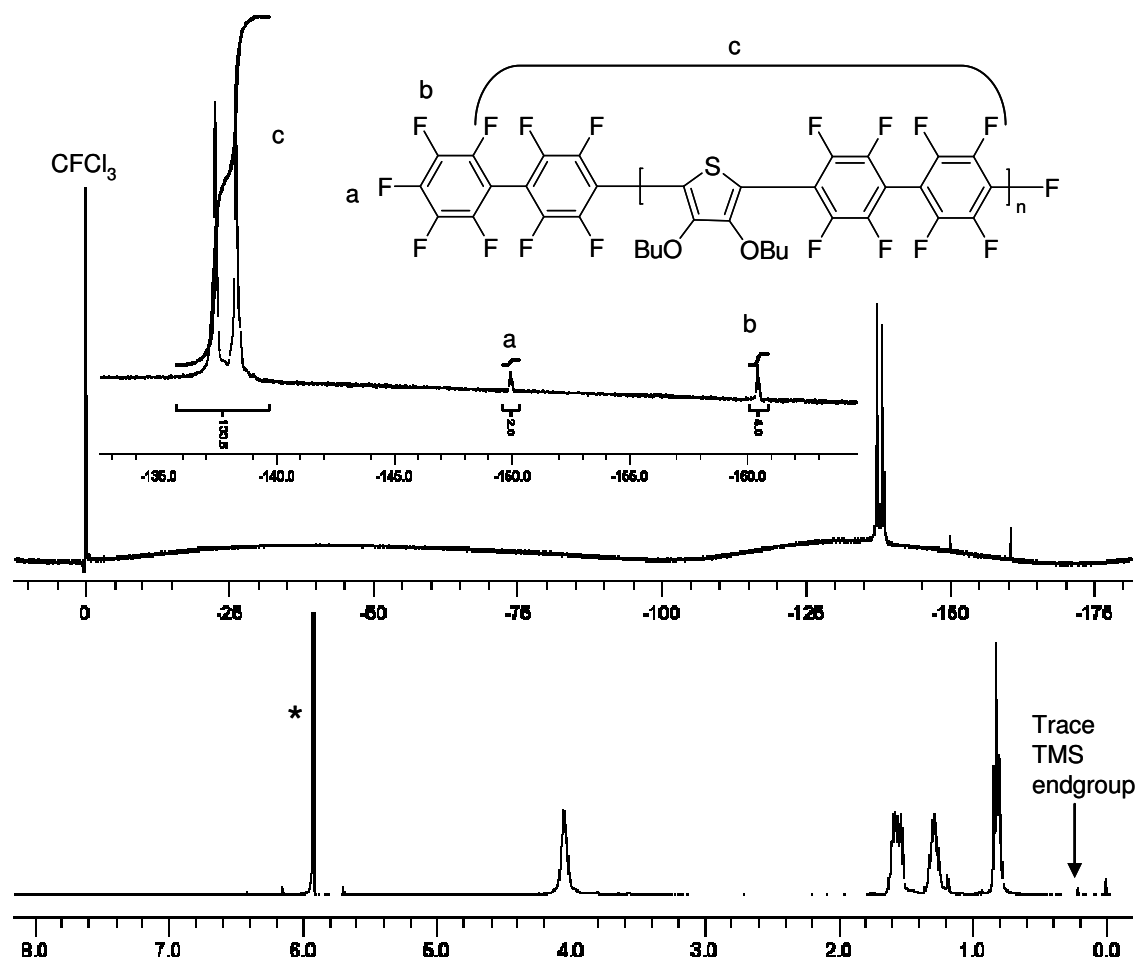

**Figure SI 2.**  $^{19}F$  and  $^1H$  NMR of polymer **2** in  $C_2D_2Cl_4$ . Number average degree of polymerization calculated from  $^{19}F$  NMR is  $P_n = (133.5F/8F) \approx 17$ , or 51 aromatic rings ( $M_n \approx 8.7$  kDa), in good agreement with GPC data ( $M_n = 17$  kDa, versus polystyrene), which typically overestimates by a factor of 2. \* ( $H$ ) $D_2C_2Cl_4$  solvent/reference.

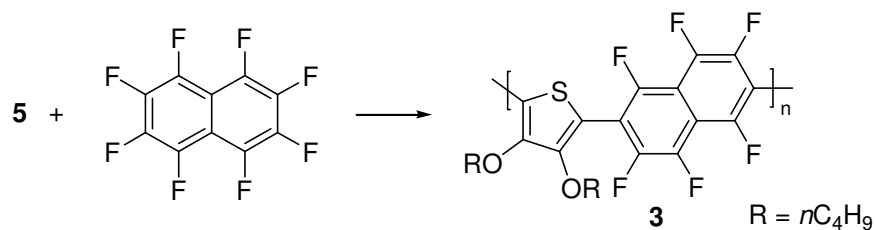

**Polymer 3.** In an argon-filled glove box, monomer **5** (105.6mg, 0.283mmol), octafluoronaphthalene (80.85mg, 1.05 eq), CsF (4.50mg, 0.1 eq), 18-crown-6 (14.96mg, 0.2 eq) and toluene (1 mL) were combined in a vacuum flask containing a magnetic stir bar. The vessel was sealed and the contents stirred at 80°C for 7 days, during which time it precipitates. The polymer was obtained as a colorless powder after purification as described above (116 mg).  $^1H$  NMR ( $C_2D_2Cl_4$ )  $\delta$ : 4.12 (broad, 4H), 1.61 (broad, 4H), 1.35 (broad, 4H), 0.86 (broad, 6H).  $^{13}C$  NMR ( $C_2D_2Cl_4$ )  $\delta$ : 149.67 (d of m), 148.83, 144.82 (d of m), 140.82 (d of m), 111.45 (m), 110.75, 72.94, 31.73, 18.79, 13.65.  $^{19}F$  NMR ( $C_2D_2Cl_4$ )  $\delta$ : *Three signals with equivalent integrals*: -116.46(m, 28F), -134.95(m, 28F), -147.15(m, 28F), *Ten small  $^{19}F$  signals from nonregiospecific addition(3) and OFN end groups (7)*: -113.43(m, 2F), -115.77(m, 2F), -132.11(m, 2F), -133.65(m, 2F), -143.53(m, 2F), -146.09(m, 2F), -148.66(m, 2F), -149.18(m, 2F), -152.53(m, 2F), -155.10(m, 2F). All of these signals coincidentally have approximately the same integral value, so any given one can be used to calculate  $P_n$ .  $M_n$  (GPC) = 13 kDa (PDI = 3.4).  $P_n$  (GPC) = 28.  $P_n$  (NMR) = 14.

#### Small-Molecule Model Studies

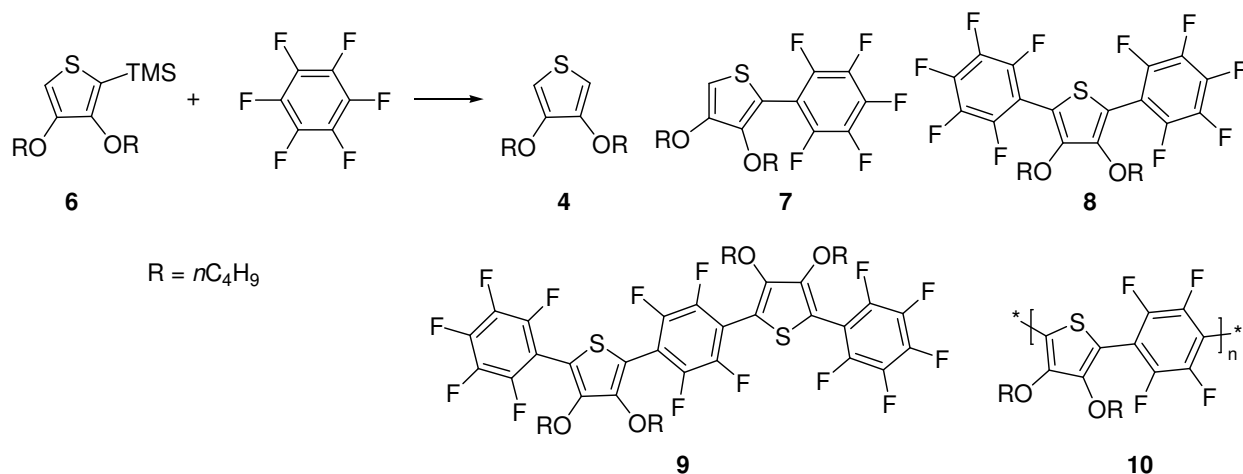

In an argon-filled glove box, **6** (518mg, 1.72 mmol),  $C_6F_6$  (199 $\mu$ L, 1eq), CsF (26.2 mg, 0.24eq), 18-crown-6 (91.1mg, 0.2eq), and toluene (2mL) were combined in a vacuum flask containing a magnetic stir bar. The vessel was sealed and the contents stirred at 80°C for 7 days. The reaction mixture was concentrated under reduced pressure and subjected to flash chromatography on silica gel with pentane-dichloromethane (5:1, v/v) to give **4** as yellow liquid (172mg, 0.753mmol, 43.7%), **7** as a liquid (14mg, 0.035mmol, 2%), **8** (13mg, 0.023mmol, 1.3%), and **9** as a colorless solid (14mg, 0.015mmol, 1.7%). Purging the column with pure dichloromethane gave a waxy solid which was determined to be higher oligomers **10** (278mg, ~ 43 %). The total isolated yield based on **6** is 92%. **Compound 4:**  $^1H$  NMR ( $CDCl_3$ )  $\delta$ : 6.18(s, 2H), 3.99(t, 4H), 1.82(m, 4H), 1.49(m, 4H), 0.99(t, 6H).  $^{13}C$  NMR ( $CDCl_3$ )  $\delta$ : 147.41, 96.67, 70.08, 30.98, 19.10, 13.75. GC-MS:  $m/z$  228 ( $C_{12}H_{20}O_2S^+$ ), 116 (100%). **Compound 7:**  $^1H$  NMR ( $CDCl_3$ )  $\delta$ : 6.39(s, 1H), 4.08(t, 2H), 4.01(t, 2H), 1.81(m, 2H), 1.60-1.35(m, 4H), 1.33(m, 2H), 0.998(t, 3H), 0.878(t, 3H).  $^{19}F$  NMR ( $CDCl_3$ )  $\delta$ : -138.60(m, 2F), -154.75(m, 1F), -162.96(m, 2F). GC-MS:  $m/z$  394 ( $C_{18}H_{19}F_5O_2S^+$ ), 282 (100%). **Compound 8:**  $^1H$  NMR ( $CDCl_3$ )  $\delta$ : 4.02(t, 4H), 1.60(m, 4H), 1.34(m, 4H), 0.89(t, 6H).  $^{19}F$  NMR ( $CDCl_3$ )  $\delta$ : -137.95(m, 4F), -153.32(m, 2F), -162.18(m, 4F). GC-MS:  $m/z$  560, ( $C_{24}H_{18}F_{10}O_2S^+$ ), 448 (100%). **Compound 9:**  $^1H$  NMR ( $CDCl_3$ )  $\delta$ : 4.07(t, 4H), 4.05(t, 4H), 1.61(m, 8H), 1.32(m, 8H), 0.89(t, 12H).  $^{19}F$  NMR ( $CDCl_3$ )  $\delta$ : -137.96(m, 4F), -138.63(s, 4F), -153.39(m, 2F), -162.22(m, 4F). MALDI:  $m/z$ : 934( $C_{42}H_{36}F_{14}O_4S_2^+$ ), 710(100%). **Oligomers 10:** See spectra below.  $M_n$  (GPC) = 4.3kDa (PDI=1.89).

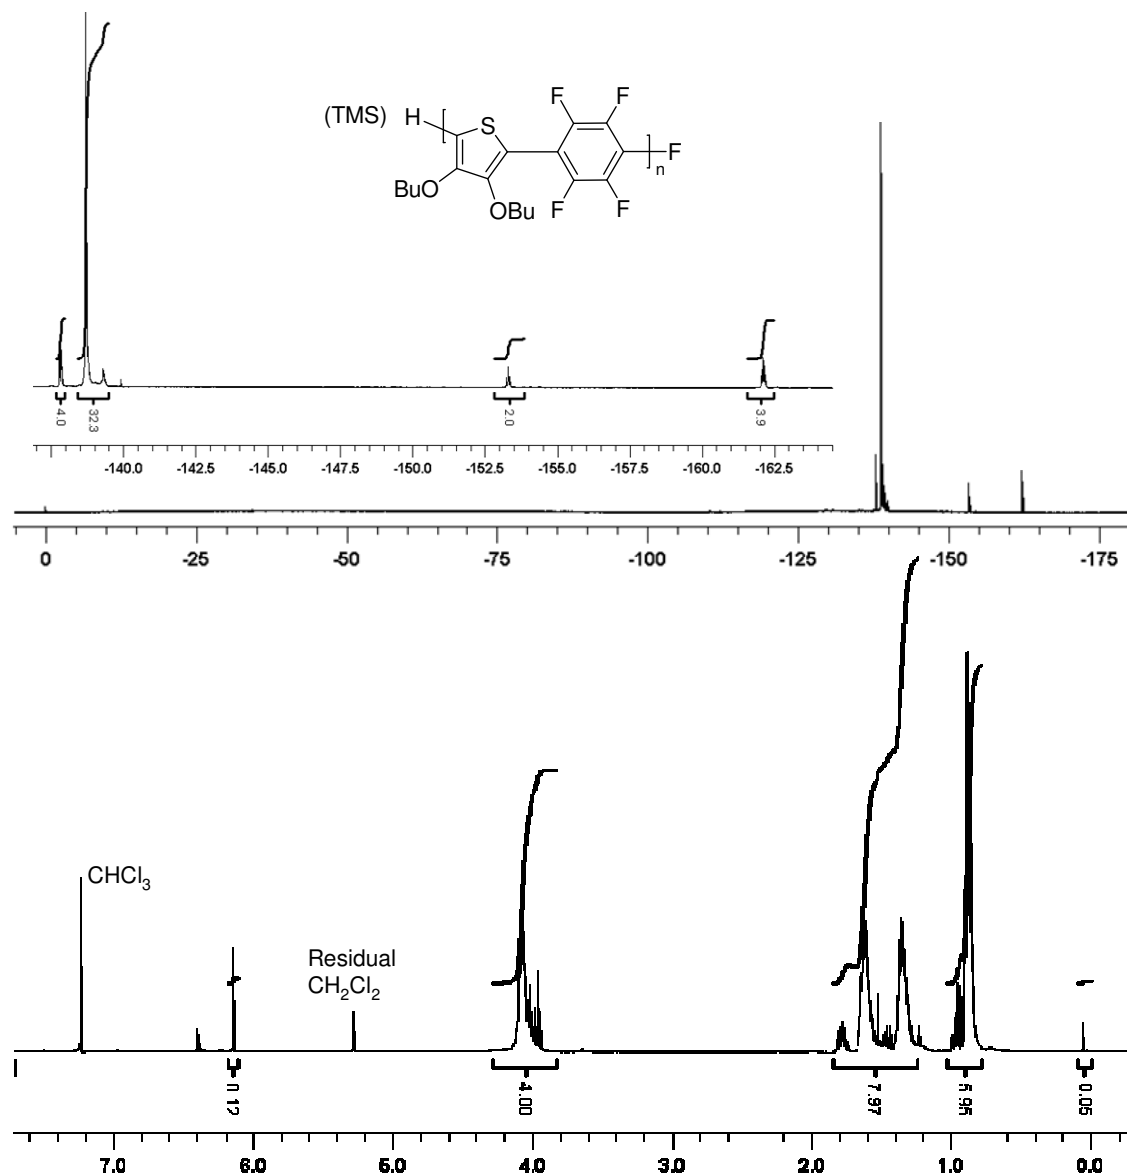

**Figure SI 3.**  $^1\text{H}$  and  $^{19}\text{F}$  NMR of oligomers **10** in  $\text{CDCl}_3$ . Compare to spectra of analogous higher polymer **1a** in Figure SI-1 above.  $^1\text{H}$  spectrum appears complicated due to low molecular weight (signals from endgroups). Number average degree of polymerization, calculated from the ratio of end-groups to repeating units (sums from both  $^1\text{H}$  and  $^{19}\text{F}$  NMR spectra), for oligomers **10** is  $P_n \approx 5.3$ . This corresponds to  $M_n \approx 2$  kDa, in good agreement with GPC data (4.3 kDa, versus polystyrene), which typically overestimates by a factor of 2.

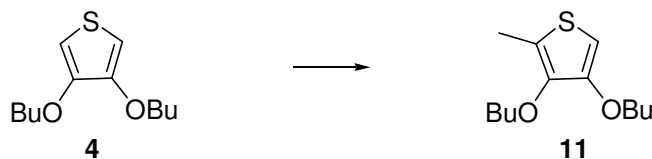

To a solution of **4** (1.12g, 4.90mmol) in THF (10mL) at 0 °C was added a hexane solution of *n*-BuLi (2.5M, 2.06mL, 1.05eq.). The whole was stirred for 30 min, gradually warmed to room temperature, then refluxed for 1 hour. After adding iodomethane (dried over  $\text{CaH}_2$ ) (0.46 mL, 1.5eq.) in one portion at 0°C, the mixture was stirred for 30 min, gradually warmed to room temperature, and left stirring overnight. The reaction mixture was diluted with  $\text{CH}_2\text{Cl}_2$ , extracted with 10% HCl (aq), dried over  $\text{MgSO}_4$ , and concentrated under reduced pressure. The residue was subjected to flash chromatography on silica gel with pentane-dichloromethane (2:1, v/v) to give **11** as a pale yellow liquid (520mg, 44%).  $^1\text{H}$  NMR ( $\text{CDCl}_3$ )  $\delta$ : 5.90(s, 1H), 3.98(t, 2H), 3.94(t, 2H), 2.28(s, 3H), 1.77(m, 2H), 1.69(m, 2H), 1.49(m, 4H), 0.98(t, 3H), 0.97(t, 3H).  $^{13}\text{C}$  NMR ( $\text{CDCl}_3$ )  $\delta$ : 150.11, 142.97, 121.32, 91.69, 72.62, 69.38, 32.12, 31.19, 19.28, 19.11, 13.84, 13.78, 11.75. GC-MS:  $m/z$  242 ( $\text{C}_{13}\text{H}_{22}\text{O}_2\text{S}^+$ ), 130 (100%).

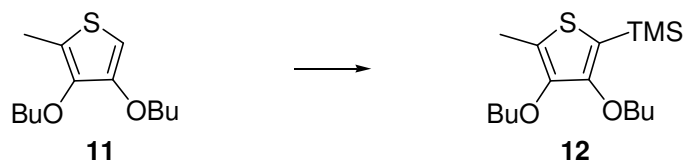

To a solution of **11** (440mg, 1.82 mmol) in THF (5mL) at 0 °C was added a hexane solution of *n*-BuLi (2.5M, 0.80mL, 1.1eq.). The resulting mixture was stirred at the same temperature for 30 min, gradually warmed to room temperature, and then refluxed for 1 hour. After adding chlorotrimethylsilane (0.28 mL, 1.2eq.) in one portion at 0°C, the mixture was stirred for 30 min, gradually warmed to room temperature and left stirring overnight. The reaction mixture was diluted with CH<sub>2</sub>Cl<sub>2</sub>, extracted with 10% HCl (aq), dried over MgSO<sub>4</sub>, and concentrated under reduced pressure. The residue was subjected to flash chromatography on silica gel with pentane-dichloromethane (3:1, v/v) to give **12** as a pale yellow liquid (490mg, 86%). <sup>1</sup>H NMR (CDCl<sub>3</sub>) δ: 3.98(t, 2H), 3.95(t, 2H), 2.30(s, 3H), 1.71(m, 4H), 1.49(m, 4H), 0.984(t, 3H), 0.979(t, 3H), 0.29(s, 9H). <sup>13</sup>C NMR (CDCl<sub>3</sub>) δ: 155.63, 147.03, 127.05, 115.12, 72.92, 32.33, 32.26, 19.29, 19.22, 14.00, 13.93, 12.33, -0.27. GC-MS: *m/z* 314 (C<sub>16</sub>H<sub>30</sub>O<sub>2</sub>SSi<sup>+</sup>), 187 (100%).

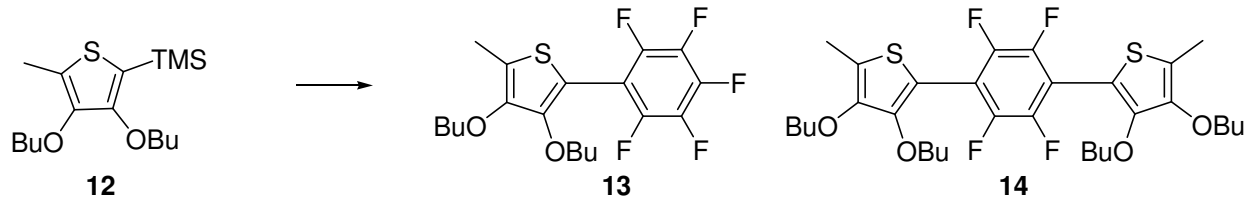

In an argon-filled glove box, **12** (380mg, 1.21 mmol), C<sub>6</sub>F<sub>6</sub> (140 μL, 1.21 mmol), CsF (18.4mg, 0.1eq), 18-crown-6 (63.9 mg, 0.2eq), and toluene (2mL) were combined in a vacuum flask containing a magnetic stir bar. The vessel was sealed and the contents stirred at RT overnight after which GC-MS revealed essentially no reaction except a trace of **13**. After heating to 80°C overnight, **12** was completely consumed (GC-MS). The reaction mixture was concentrated under reduced pressure to an oily residue, which was subjected to flash chromatography on silica gel with pentane-dichloromethane (3:1, v/v) to give **13** as a pale yellow liquid (217mg, 0.531mmol) and **14** as a colorless solid (183mg, 0.290mmol). The total isolated yield based on **12** was 92%. **Compound 13**: <sup>1</sup>H NMR (CDCl<sub>3</sub>) δ: 4.012(t, 2H), 4.009(t, 2H), 2.36(s, 3H), 1.74(m, 2H), 1.57(m, 4H), 1.33(m, 2H), 0.999(t, 3H), 0.879(t, 3H). <sup>19</sup>F NMR (CDCl<sub>3</sub>) δ: -138.74(m, 2F), -155.27(m, 1F), -163.09(m, 2F). <sup>13</sup>C NMR (CDCl<sub>3</sub>) δ: 148.92, 145.68, 144.79 (d of m), 140.77 (d of m), 137.64(d of tr), 124.72, 108.46 (m), 102.11, 73.29, 72.36, 32.17, 31.87, 19.19, 18.90, 13.82, 13.62, 11.91. GC-MS: *m/z* 408 (C<sub>19</sub>H<sub>21</sub>F<sub>5</sub>O<sub>2</sub>S<sup>+</sup>), 296 (100%). **Compound 14**: <sup>1</sup>H NMR (CDCl<sub>3</sub>) δ: 4.03(m, 8H), 2.37(s, 6H), 1.78(m, 4H), 1.57(m, 8H), 1.35(m, 4H), 1.002(t, 6H), 0.886(t, 6H). <sup>19</sup>F NMR (CDCl<sub>3</sub>) δ: -140.24(s, 4F). <sup>13</sup>C NMR (CDCl<sub>3</sub>) δ: 148.80, 145.66, 144.25 (d of m), 124.55, 112.44 (m), 103.46, 73.24, 72.33, 32.15, 31.88, 19.17, 18.89, 13.84, 13.66, 11.93. GC-MS: *m/z* 630 (C<sub>32</sub>H<sub>42</sub>F<sub>5</sub>O<sub>4</sub>S<sub>2</sub><sup>+</sup>), 406(100%).

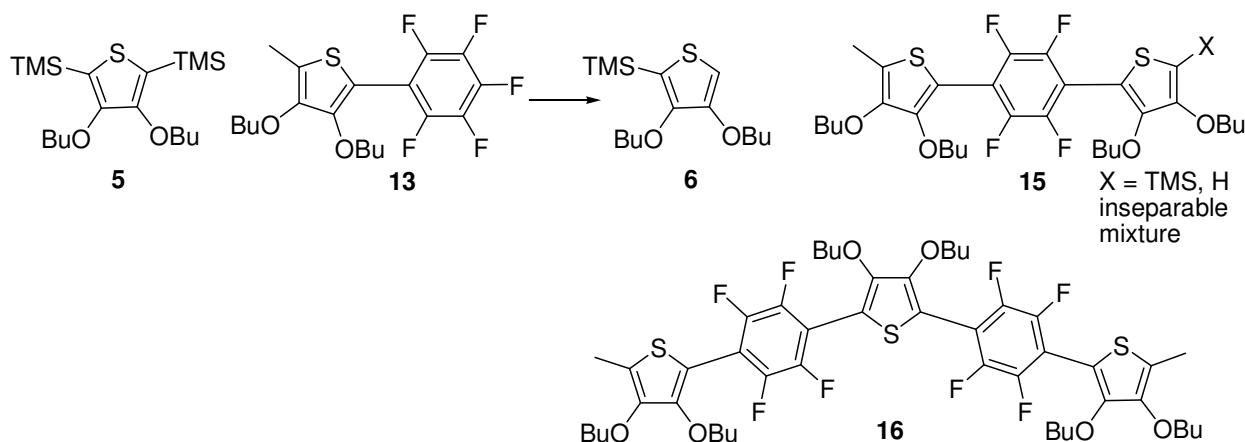

In an argon-filled glove box, **5** (100.2 mg, 0.269mmol), **13** (109.8mg, 0.269mmol), CsF (4.1mg, 0.1eq), 18-crown-6 (14.2 mg, 0.2eq), and toluene (1mL) were combined in a vacuum flask containing a magnetic stir bar. The vessel was sealed and the contents stirred at 80°C overnight. The reaction mixture was concentrated under reduced pressure to an oily residue, which was subjected to column chromatography on silica gel with pentane-dichloromethane (3:1, v/v) to give **5** (30mg, 30% recovered yield), **6** (11mg, 13% based on **5**) and **16** as a pale yellow liquid (100mg, 74% based on **13**). The remainder of products (**15**) resulting from reaction of **5** and **13** were obtained as an inseparable mixture (43mg). The <sup>1</sup>H NMR spectrum of this mixture contained singlets corresponding to the methyls on the thiophene and TMS groups, as well as protons attached to the thiophene. **Compound 16**: <sup>1</sup>H NMR (CDCl<sub>3</sub>) δ: 4.06 (overlapping triplets, 12H), 2.38 (s, 6H), 1.76-1.33 (overlapping multiplets, 24H), 1.00 (t, 6H), 0.90 (t, 6H), 0.89 (t, 6H). <sup>19</sup>F NMR (CDCl<sub>3</sub>) δ: -139.59 (m). <sup>13</sup>C NMR (CDCl<sub>3</sub>) δ: 148.98, 148.60, 145.73, 144.26 (d of m), 124.89, 113.45 (m), 111.43 (m), 110.70, 103.31, 73.31, 72.92, 72.40, 32.17, 31.92, 31.90, 19.19, 18.92, 18.90, 13.87, 13.70, 13.68, 12.00. MALDI: *m/z*: 1004(C<sub>50</sub>H<sub>60</sub>F<sub>8</sub>O<sub>6</sub>S<sub>3</sub><sup>+</sup>), 912(100%).

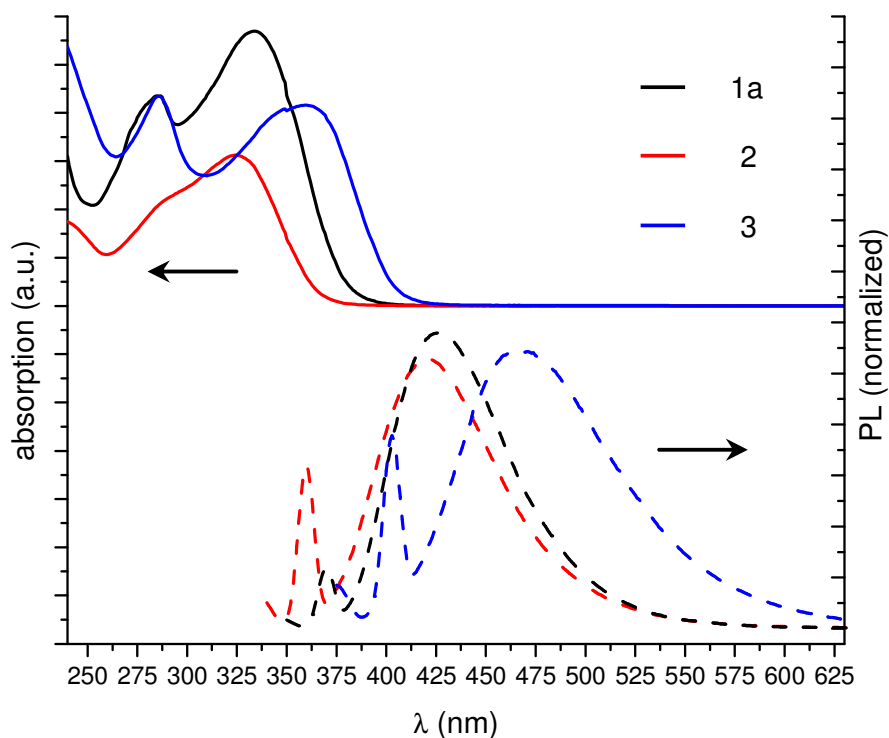

**Figure SI 4.** Absorption and emission spectra of polymers **1a**, **2**, and **3**.  $10^{-5}$  M in THF (molarity based on formula mass of repeating units).

**Complete reference 1i:**

Crouch, D.J.; Skabara, P.J.; Lohr, J.E.; McDouall, J.J.W.; Heeney, M.; McCulloch, I.; Sparrowe, D.; Shkunov, M.; Coles, S.J.; Horton, P.N.; Hursthouse, M.B. *Chem. Mater.* **2005**, *17*, 6567-78.
